# Supplementary material for: Zhankuic Acids A, B and C from Taiwanofungus camphoratus Act as Cytotoxicity Enhancers by Regulating P-Glycoprotein in Multi-Drug Resistant Cancer Cells
Source: PubMed Central journal article supplement (PMC6995581; doi:10.3390/biom9120759), 2019-11-21
Supplement: biomolecules-09-00759-s001.pdf [file biomolecules-09-00759-s001.pdf]

## Supplementary materials

|                                                                                                                                                                                                                              |    |
|------------------------------------------------------------------------------------------------------------------------------------------------------------------------------------------------------------------------------|----|
| Supplementary table 1. The effects of ZA-A, ZA-B, and ZA-C on the transport of rhodamine123 by human P-gp.....                                                                                                               | 2  |
| Supplementary table 2. The effects of ZA-A, ZA-B, and ZA-C on the transport of doxorubicin by human P-gp.....                                                                                                                | 3  |
| Supplementary table 3. The detailed percentage of phases in cell cycle analysis.....                                                                                                                                         | 4  |
| Supplementary figure 1. The cytotoxicity of ZA-A, ZA-B, and ZA-C in (a) Flp-In <sup>TM</sup> -293, (b) <i>ABCB1</i> / Flp-In <sup>TM</sup> -293, (c) HeLaS3, and (d) KB/VIN, respectively.....                               | 6  |
| Supplementary figure 2. The individual results of cell cycle distribution after 72 h treatment in (a) Flp-In <sup>TM</sup> -293, (b) <i>ABCB1</i> / Flp-In <sup>TM</sup> -293, (c) HeLaS3, and (d) KB/VIN, respectively..... | 9  |
| Supplementary figure 3. The apoptosis phenomenon of 72 h treatment in (a) Flp-In <sup>TM</sup> -293, (b) <i>ABCB1</i> / Flp-In <sup>TM</sup> -293, and (c) HeLaS3 cell lines. ....                                           | 13 |

**Supplementary table 1. The effects of ZA-A, ZA-B, and ZA-C on the transport of rhodamine123 by human P-gp.**

| Nonlinear kinetic parameters         |                      |                   |
|--------------------------------------|----------------------|-------------------|
| <i>ABCBI/Flp-In<sup>TM</sup>-293</i> | $V_m$ (pmole/10 min) | $K_m$ ( $\mu$ M)  |
| Rhodamine123 only                    | 13.17 $\pm$ 1.64     | 17.66 $\pm$ 3.69  |
| + ZA-A, 1 $\mu$ M                    | 14.09 $\pm$ 1.01     | 39.02 $\pm$ 1.38* |
| + ZA-A, 10 $\mu$ M                   | 13.61 $\pm$ 1.81     | 93.07 $\pm$ 0.68* |
| $K_i$                                |                      | 5.54 $\pm$ 0.53   |
| Rhodamine123 only                    | 13.37 $\pm$ 0.11     | 22.15 $\pm$ 0.48  |
| + ZA-B, 1 $\mu$ M                    | 8.57 $\pm$ 0.89*     | 21.18 $\pm$ 4.44  |
| + ZA-B, 10 $\mu$ M                   | 4.98 $\pm$ 0.10*     | 21.50 $\pm$ 0.28  |
| $K_i$                                |                      | 9.80 $\pm$ 1.80   |
| Rhodamine123 only                    | 15.65 $\pm$ 1.03     | 27.07 $\pm$ 3.04  |
| + ZA-C, 1 $\mu$ M                    | 15.54 $\pm$ 1.02     | 40.83 $\pm$ 1.34* |
| + ZA-C, 10 $\mu$ M                   | 14.12 $\pm$ 0.46     | 54.27 $\pm$ 1.10* |
| $K_i$                                |                      | 11.71 $\pm$ 1.73  |

\*  $p < 0.05$  as compared to the rhodamine123 transport without ZA-A, ZA-B, or ZA-C.

**Supplementary table 2. The effects of ZA-A, ZA-B, and ZA-C on the transport of doxorubicin by human P-gp.**

| <i>ABCB1</i> /Flp-In <sup>TM</sup> -293 | Nonlinear kinetic parameters |                    |
|-----------------------------------------|------------------------------|--------------------|
|                                         | $V_m$ (pmole/ 120 min)       | $K_m$ ( $\mu$ M)   |
| Doxorubicin only                        | 12.52 $\pm$ 1.12             | 17.88 $\pm$ 2.72   |
| + ZA-A, 1 $\mu$ M                       | 12.02 $\pm$ 0.02             | 38.65 $\pm$ 2.44*  |
| + ZA-A, 10 $\mu$ M                      | 12.16 $\pm$ 2.85             | 111.65 $\pm$ 0.00* |
| $K_i$                                   |                              | 4.68 $\pm$ 1.27    |
| Doxorubicin only                        | 30.19 $\pm$ 3.04             | 44.20 $\pm$ 2.36   |
| + ZA-B, 1 $\mu$ M                       | 23.09 $\pm$ 0.99*            | 44.97 $\pm$ 1.40   |
| + ZA-B, 10 $\mu$ M                      | 17.52 $\pm$ 1.43*            | 45.77 $\pm$ 1.99   |
| $K_i$                                   |                              | 16.40 $\pm$ 1.00   |
| Doxorubicin only                        | 19.86 $\pm$ 0.55             | 19.48 $\pm$ 0.28   |
| + ZA-C, 1 $\mu$ M                       | 18.11 $\pm$ 1.05             | 33.13 $\pm$ 3.33*  |
| + ZA-C, 10 $\mu$ M                      | 17.76 $\pm$ 1.36             | 67.09 $\pm$ 3.18*  |
| $K_i$                                   |                              | 6.81 $\pm$ 1.39    |

\*  $p < 0.05$  as compared to the doxorubicin transport without ZA-A, ZA-B, or ZA-C.

**Supplementary table 3. The detailed percentage of phases in cell cycle analysis.**

| <b>Flp-In<sup>TM</sup>-293</b>       | Percentage of phase $\pm$ S.E. (%) |                                    |                |                        |
|--------------------------------------|------------------------------------|------------------------------------|----------------|------------------------|
|                                      | <b>Sub G<sub>1</sub></b>           | <b>G<sub>0</sub>/G<sub>1</sub></b> | <b>S</b>       | <b>G<sub>2</sub>/M</b> |
| Control                              | 0.6 $\pm$ 0.3                      | 48.8 $\pm$ 0.2                     | 38.8 $\pm$ 0.6 | 11.8 $\pm$ 0.6         |
| Paclitaxel 1 nM                      | 3.3 $\pm$ 0.3                      | 41.2 $\pm$ 0.2                     | 45.5 $\pm$ 0.6 | 10.0 $\pm$ 0.3         |
| ZA-A 20 $\mu$ M                      | 3.0 $\pm$ 0.2                      | 42.7 $\pm$ 0.1                     | 45.4 $\pm$ 0.1 | 8.8 $\pm$ 0.4          |
| ZA-A 40 $\mu$ M                      | 3.3 $\pm$ 0.1                      | 39.1 $\pm$ 0.4                     | 49.3 $\pm$ 0.6 | 8.3 $\pm$ 0.2          |
| Paclitaxel 1 nM + ZA-A 20 $\mu$ M    | 2.4 $\pm$ 0.7                      | 43.0 $\pm$ 0.6                     | 45.1 $\pm$ 0.8 | 9.5 $\pm$ 0.7          |
| Paclitaxel 1 nM + ZA-A 40 $\mu$ M    | 4.2 $\pm$ 0.7                      | 40.2 $\pm$ 1.0                     | 49.2 $\pm$ 0.5 | 6.5 $\pm$ 0.3          |
| <b>ABCBI/Flp-In<sup>TM</sup>-293</b> | Percentage of phase $\pm$ S.E. (%) |                                    |                |                        |
|                                      | <b>Sub G<sub>1</sub></b>           | <b>G<sub>0</sub>/G<sub>1</sub></b> | <b>S</b>       | <b>G<sub>2</sub>/M</b> |
| Control                              | 1.0 $\pm$ 0.03                     | 41.5 $\pm$ 0.2                     | 45.5 $\pm$ 0.3 | 12.0 $\pm$ 0.1         |
| Paclitaxel 250 nM                    | 5.1 $\pm$ 1.8                      | 54.6 $\pm$ 2.8                     | 13.8 $\pm$ 2.6 | 26.5 $\pm$ 0.8         |
| ZA-A 20 $\mu$ M                      | 1.5 $\pm$ 0.04                     | 40.3 $\pm$ 0.9                     | 45.5 $\pm$ 1.3 | 12.8 $\pm$ 0.5         |
| ZA-A 40 $\mu$ M                      | 1.3 $\pm$ 0.1                      | 37.2 $\pm$ 0.4                     | 50.1 $\pm$ 0.5 | 11.4 $\pm$ 0.3         |
| Paclitaxel 250 nM + ZA-A 20 $\mu$ M  | 14.1 $\pm$ 2.0                     | 24.5 $\pm$ 0.3                     | 26.2 $\pm$ 1.4 | 35.2 $\pm$ 1.5         |
| Paclitaxel 250 nM + ZA-A 40 $\mu$ M  | 22.6 $\pm$ 0.3                     | 11.8 $\pm$ 0.2                     | 27.2 $\pm$ 1.3 | 38.3 $\pm$ 1.5         |
| <b>HeLaS3</b>                        | Percentage of phase $\pm$ S.E. (%) |                                    |                |                        |
|                                      | <b>Sub G<sub>1</sub></b>           | <b>G<sub>0</sub>/G<sub>1</sub></b> | <b>S</b>       | <b>G<sub>2</sub>/M</b> |
| Control                              | 0.1 $\pm$ 0.02                     | 61.1 $\pm$ 0.7                     | 30.9 $\pm$ 0.6 | 8.0 $\pm$ 0.2          |
| Paclitaxel 1 nM                      | 2.0 $\pm$ 0.6                      | 26.2 $\pm$ 1.7                     | 63.0 $\pm$ 1.0 | 8.8 $\pm$ 1.2          |
| ZA-A 20 $\mu$ M                      | 8.3 $\pm$ 1.2                      | 52.1 $\pm$ 0.5                     | 28.4 $\pm$ 0.6 | 10.9 $\pm$ 0.04        |
| ZA-A 40 $\mu$ M                      | 10.9 $\pm$ 0.3                     | 52.0 $\pm$ 0.3                     | 28.3 $\pm$ 0.9 | 8.8 $\pm$ 0.3          |
| Paclitaxel 1 nM + ZA-A 20 $\mu$ M    | 4.8 $\pm$ 0.1                      | 27.3 $\pm$ 1.4                     | 54.2 $\pm$ 0.2 | 13.8 $\pm$ 1.1         |
| Paclitaxel 1 nM + ZA-A 40 $\mu$ M    | 2.3 $\pm$ 0.3                      | 21.6 $\pm$ 0.2                     | 61.3 $\pm$ 0.8 | 14.9 $\pm$ 0.5         |
| <b>KB/VIN</b>                        | Percentage of phase $\pm$ S.E. (%) |                                    |                |                        |
|                                      | <b>Sub G<sub>1</sub></b>           | <b>G<sub>0</sub>/G<sub>1</sub></b> | <b>S</b>       | <b>G<sub>2</sub>/M</b> |
| Control                              | 0.3 $\pm$ 0.1                      | 57.8 $\pm$ 0.2                     | 36.2 $\pm$ 0.6 | 5.8 $\pm$ 0.6          |
| Paclitaxel 250 nM                    | 12.9 $\pm$ 1.6                     | 53.9 $\pm$ 0.2                     | 30.8 $\pm$ 1.2 | 2.4 $\pm$ 0.5          |
| ZA-A 20 $\mu$ M                      | 13.3 $\pm$ 2.3                     | 50.6 $\pm$ 0.8                     | 32.7 $\pm$ 1.2 | 3.5 $\pm$ 0.5          |
| ZA-A 40 $\mu$ M                      | 10.9 $\pm$ 0.6                     | 54.7 $\pm$ 0.4                     | 27.7 $\pm$ 1.6 | 6.7 $\pm$ 0.5          |
| Paclitaxel 250 nM + ZA-A 20 $\mu$ M  | 24.8 $\pm$ 1.0                     | 28.2 $\pm$ 0.8                     | 12.3 $\pm$ 0.3 | 34.7 $\pm$ 0.6         |
| Paclitaxel 250 nM + ZA-A 40 $\mu$ M  | 34.3 $\pm$ 0.4                     | 20.6 $\pm$ 1.6                     | 21.2 $\pm$ 2.4 | 23.8 $\pm$ 0.3         |

Supplementary figure 1.

(a)

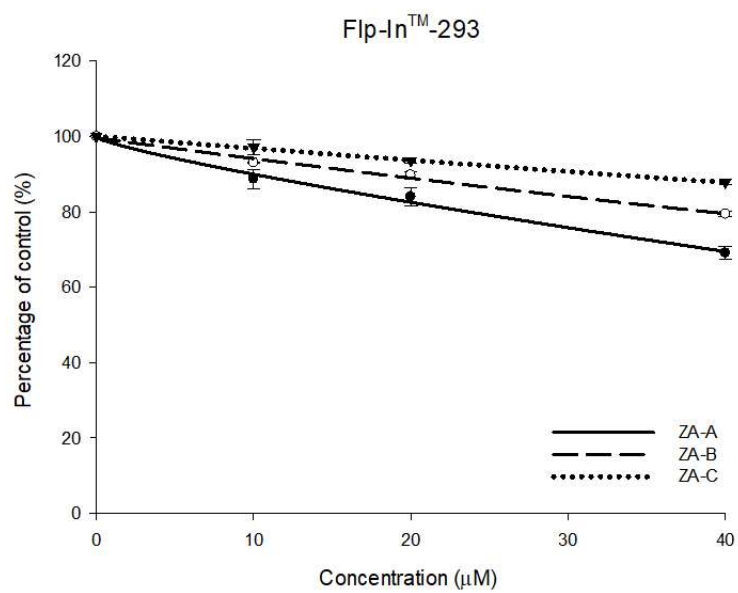

(b)

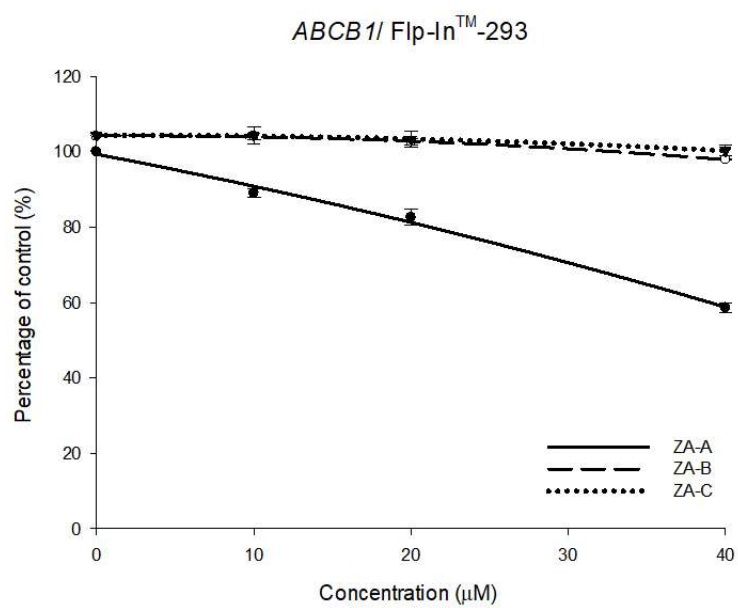

(c)

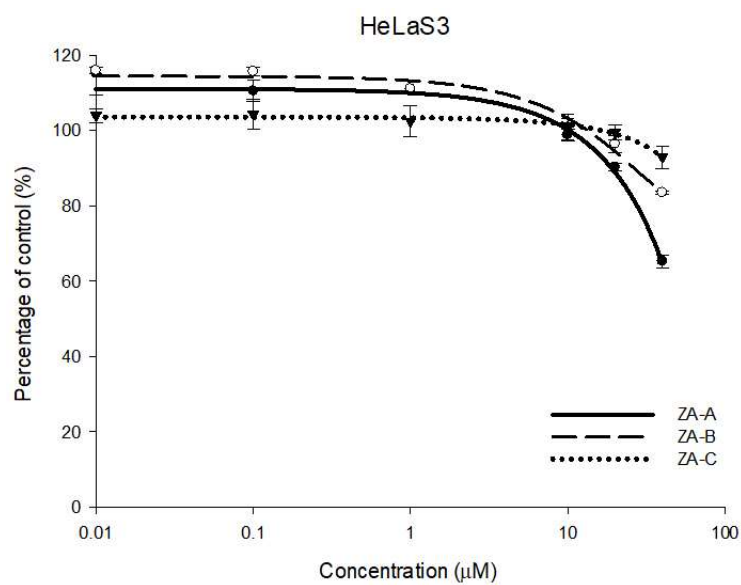

(d)

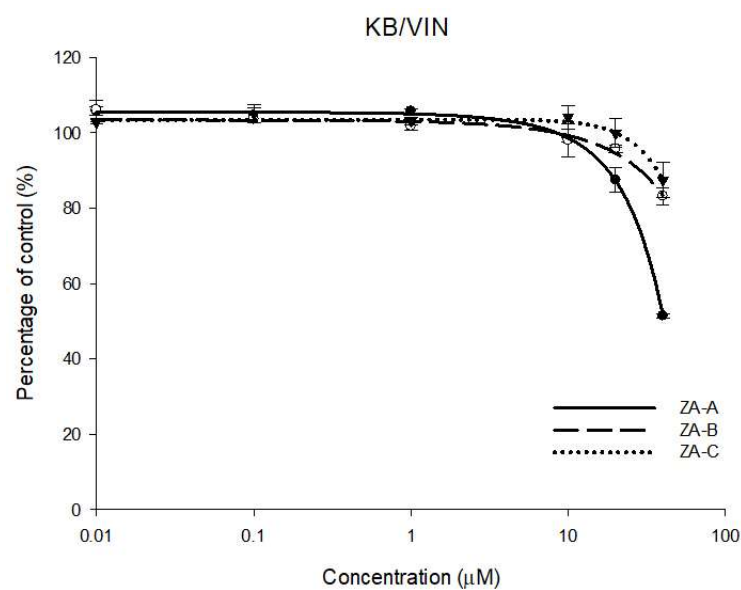

**Supplementary figure 1. The cytotoxicity of ZA-A, ZA-B, and ZA-C in (a) Flp-In<sup>TM</sup>-293, (b) ABCB1/ Flp-In<sup>TM</sup>-293, (c) HeLaS3, and (d) KB/VIN, respectively.**

Data were presented as mean  $\pm$  SE of at least three experiments, each in triplicate.

Supplementary figure 2.

(a)

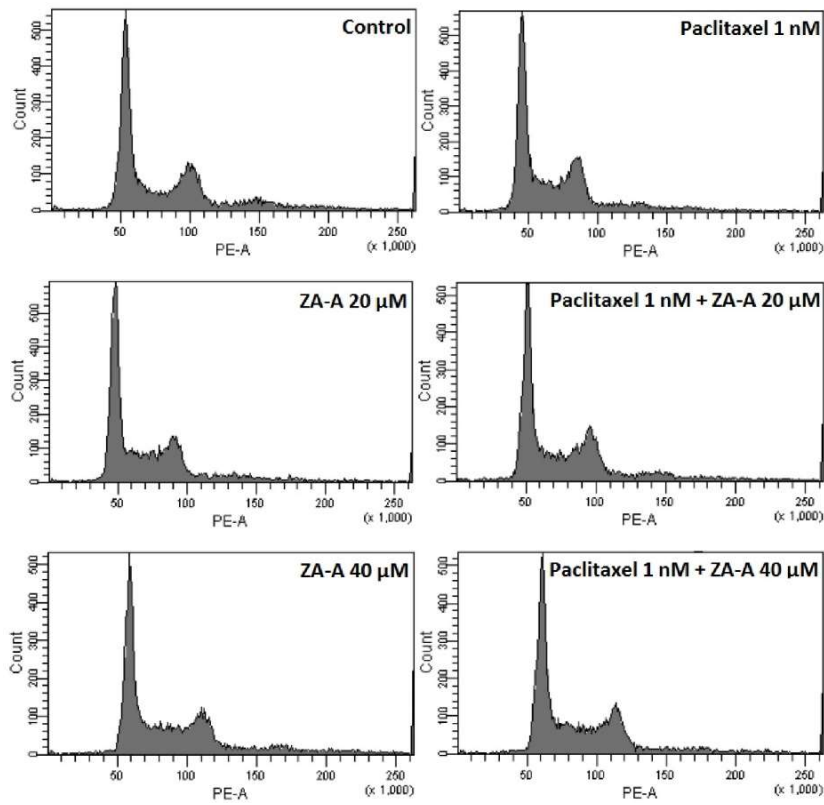

(b)

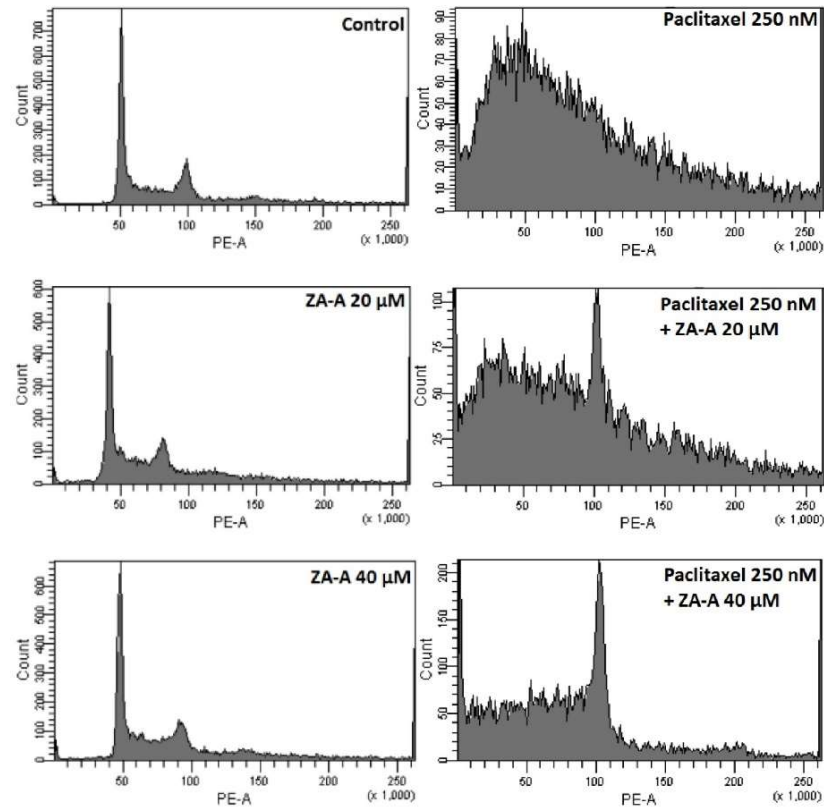

(c)

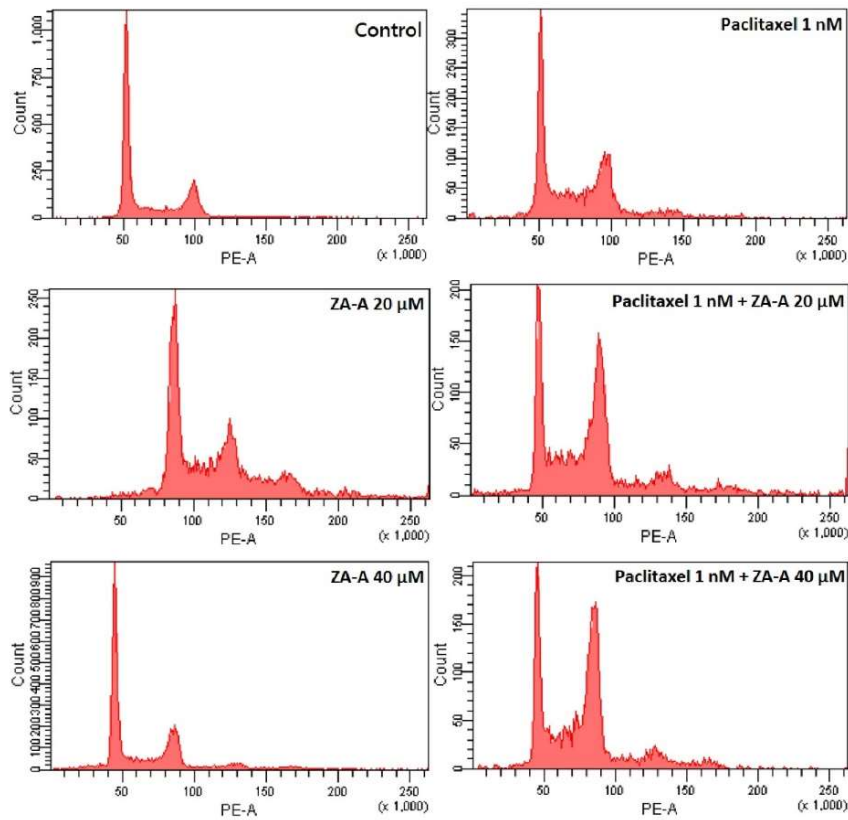

(d)

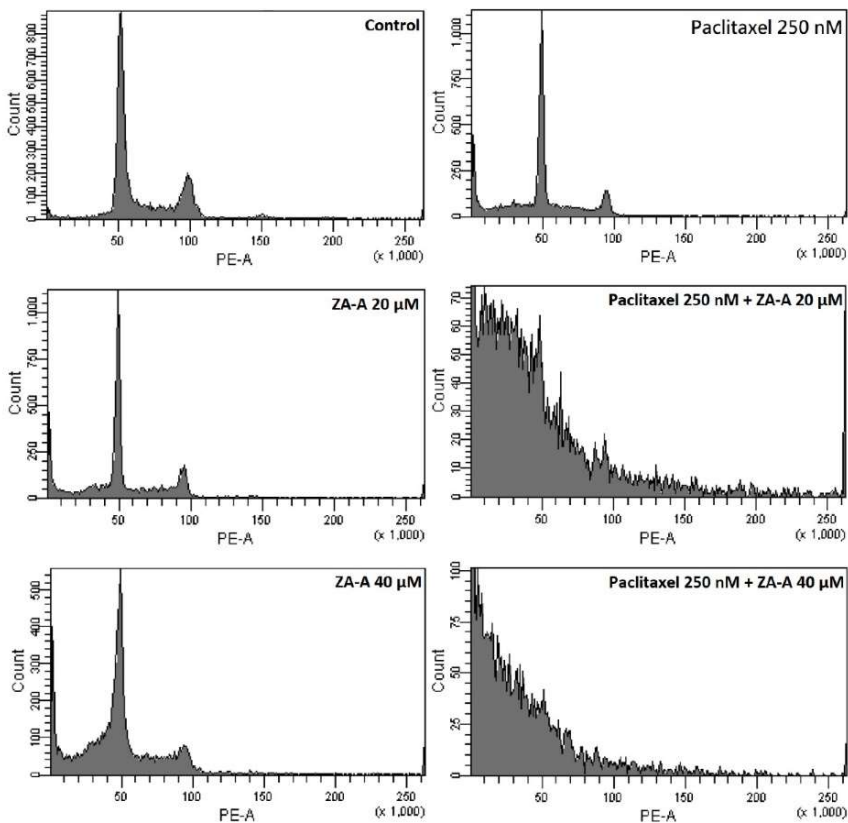



**Supplementary figure 2. The individual results of cell cycle distribution after 72 h treatment in (a) Flp-In<sup>TM</sup>-293, (b) *ABCB1*/ Flp-In<sup>TM</sup>-293, (c) HeLaS3, and (d) KB/VIN, respectively.**

Supplementary figure 3.

(a)

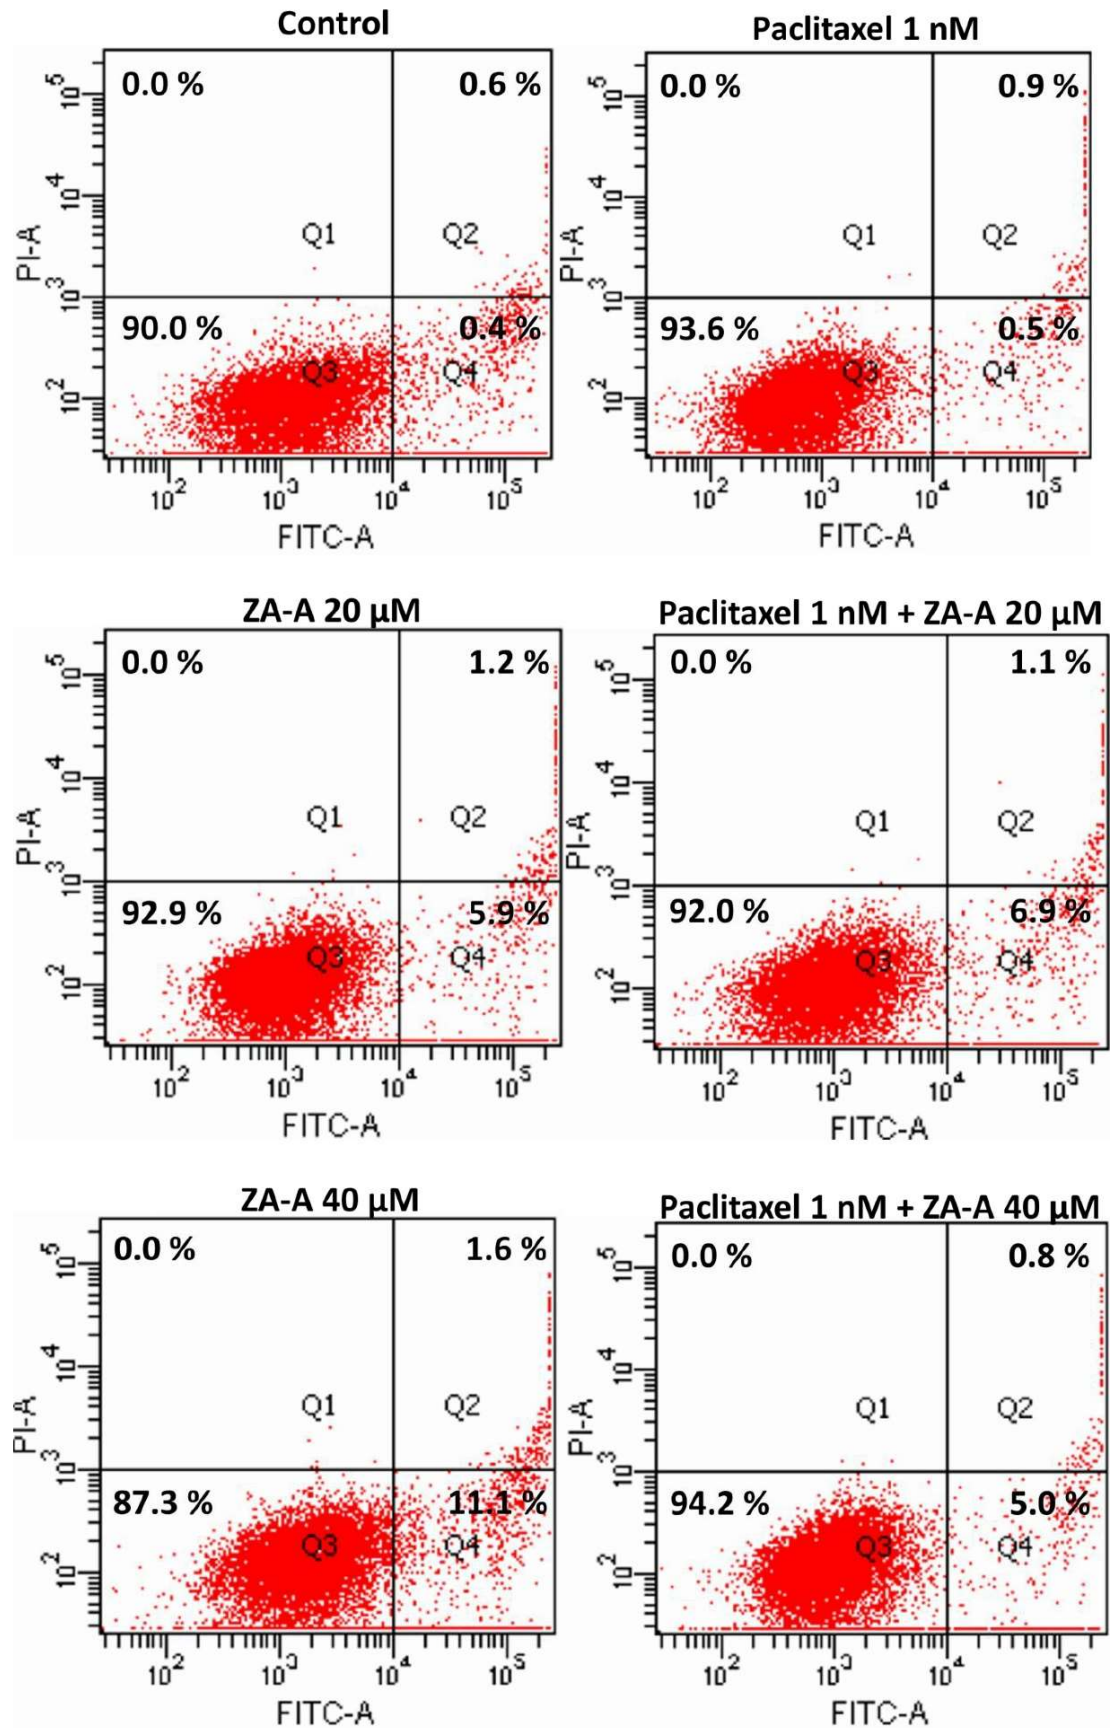

(b)

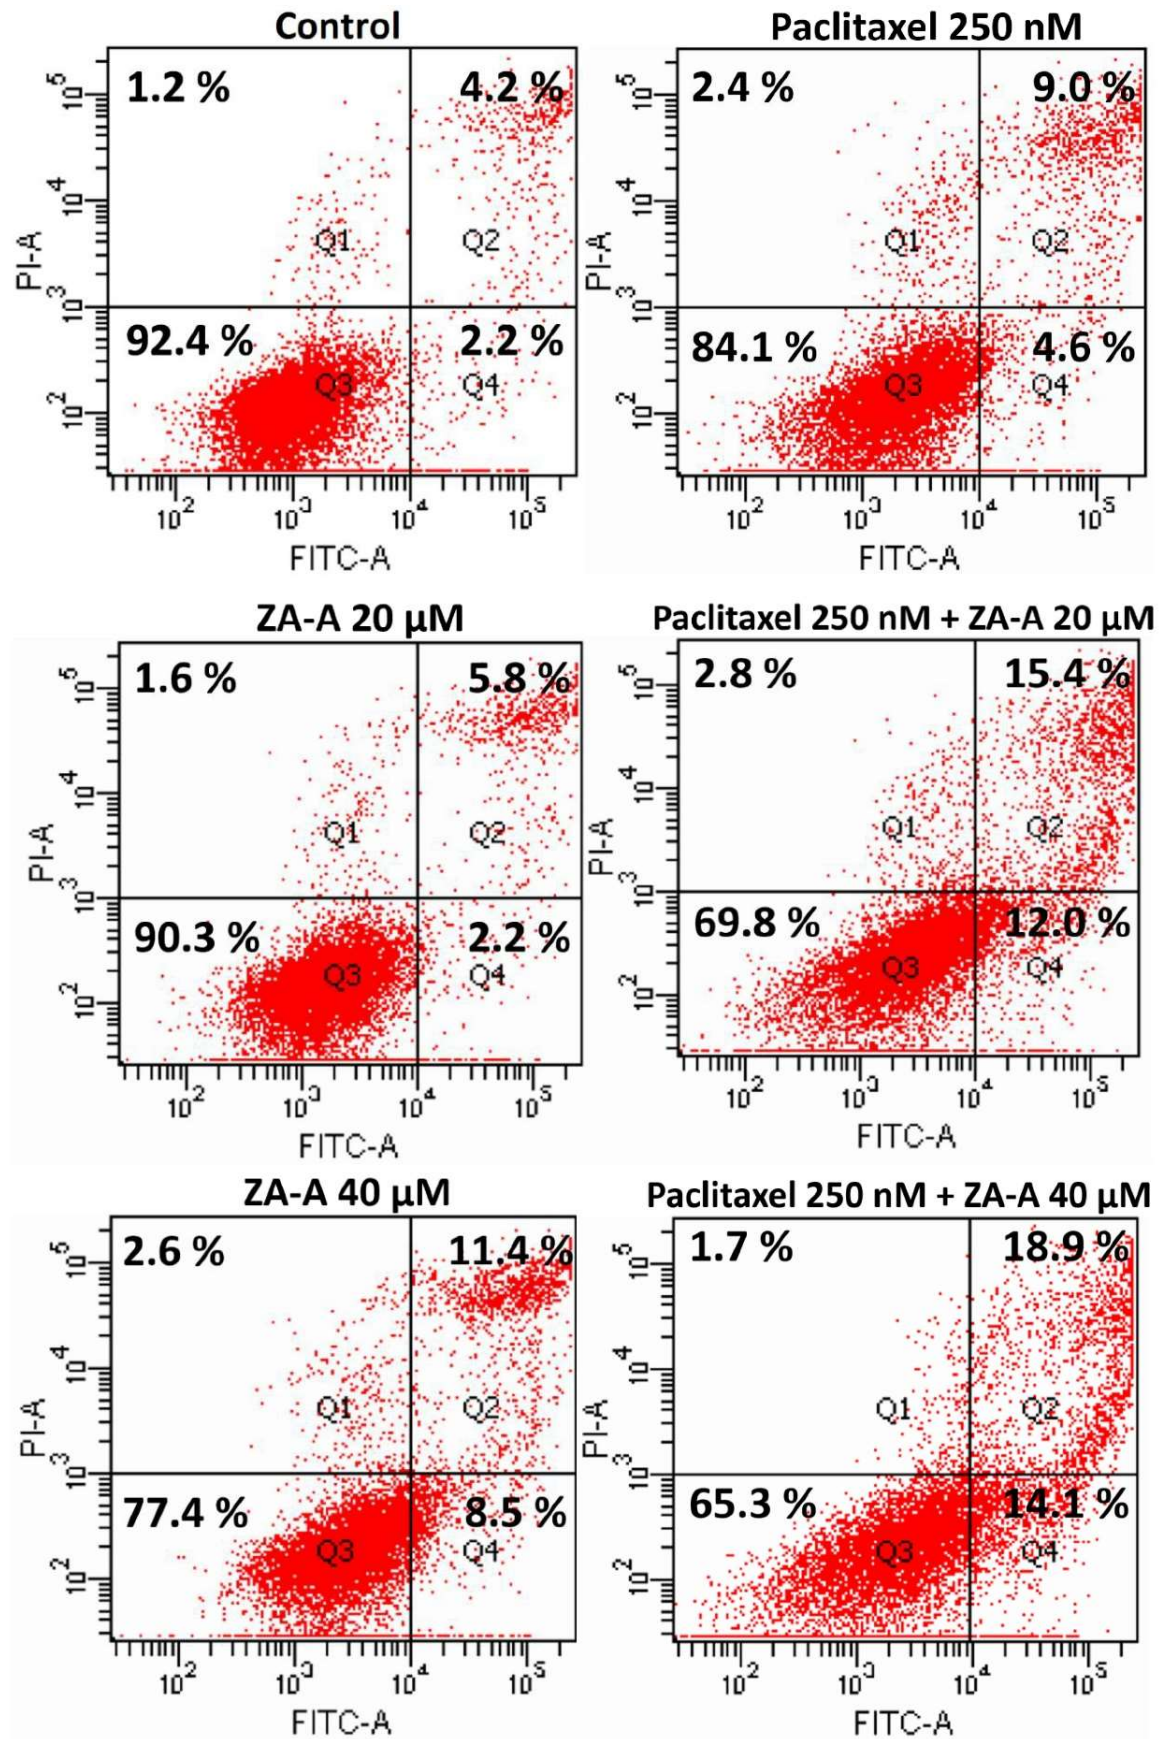

(c)

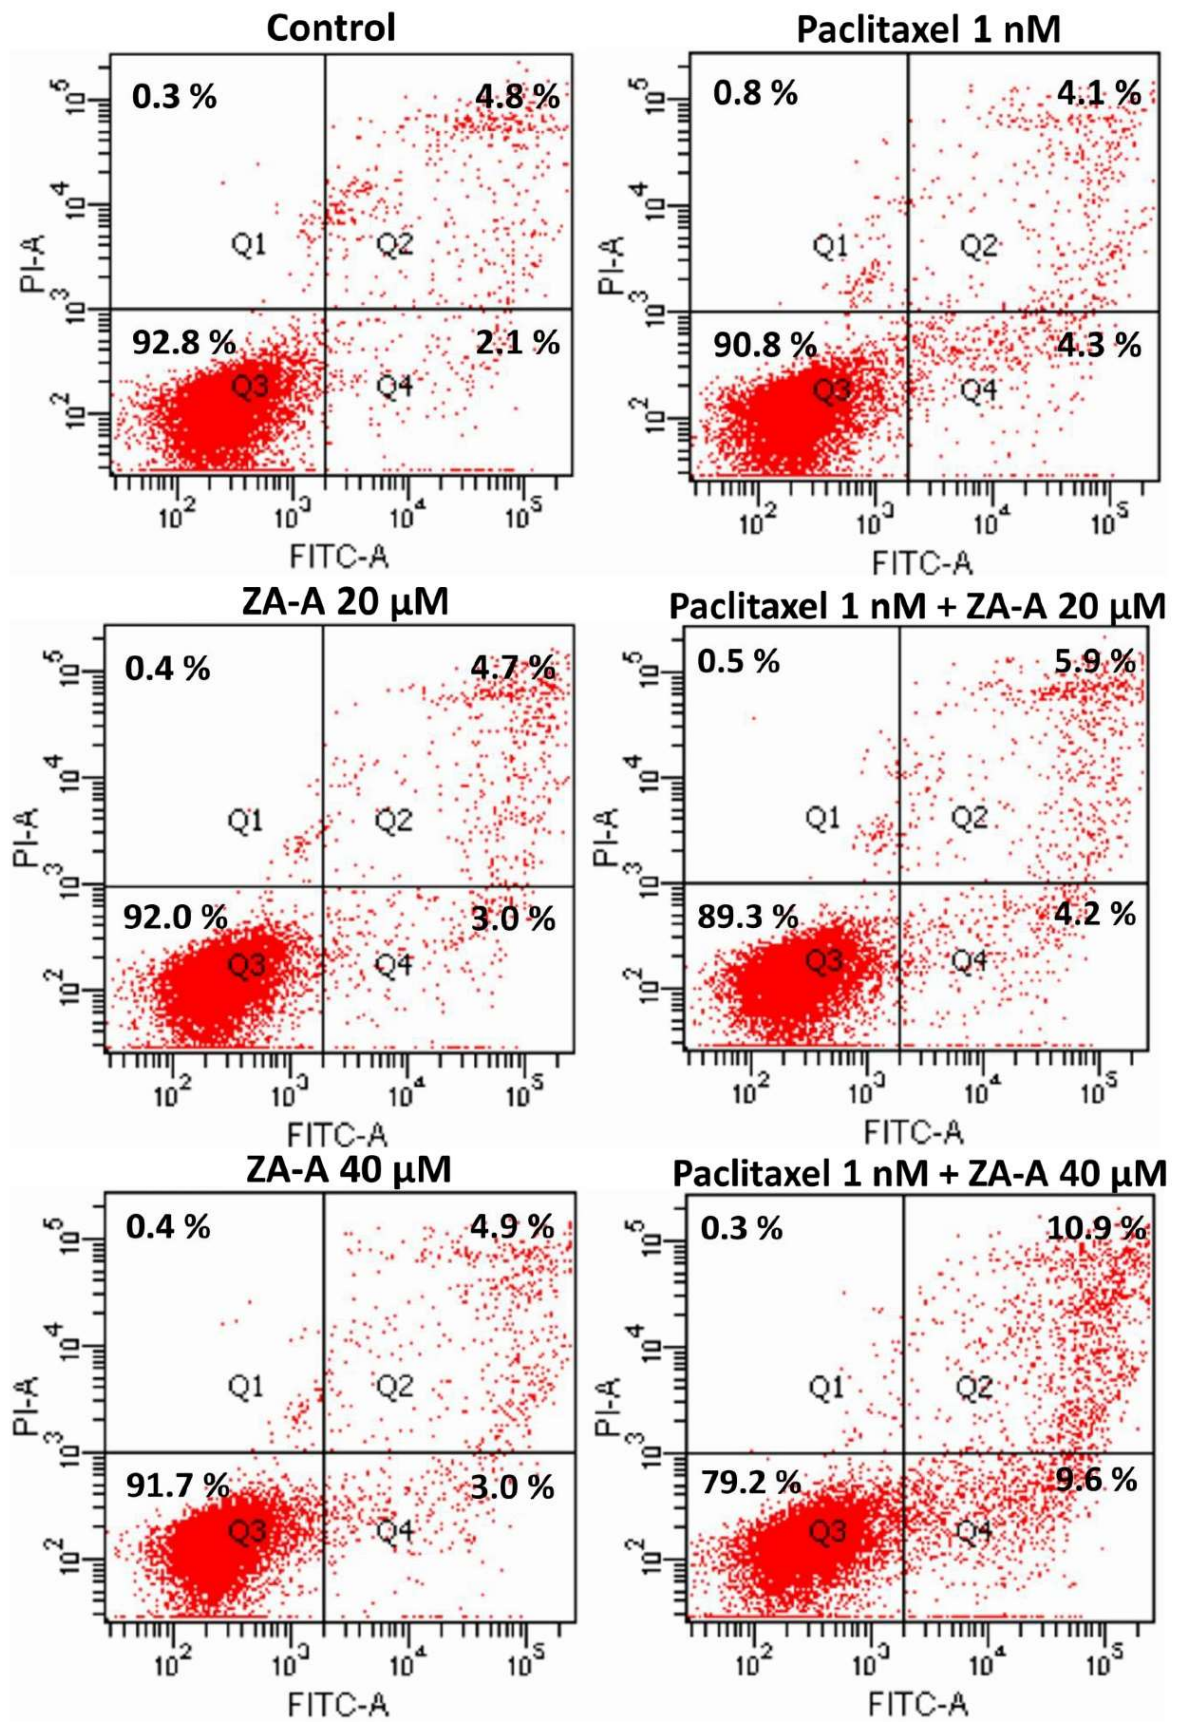

**Supplementary figure 3. The apoptosis phenomenon of 72 h treatment in (a) Flp-In<sup>TM</sup>-293, (b) *ABCBI*/ Flp-In<sup>TM</sup>-293, and (c) HeLaS3 cell lines.**

Apoptosis and necrosis status of each sample was determined by annexin V (X-axis FITC) and PI (Y-axis PI). Cell distributed in Q1, Q2, Q3 and Q4 represented necrosis, late-apoptosis, normal and early-apoptosis, respectively.
